# Supplementary material for: E-Cadherin expression in human tumors: a tissue microarray study on 10,851 tumors
Source: PubMed Central journal article supplement (PMC8180156; doi:10.1186/s40364-021-00299-4), 2021-06-05
Supplement: 40364_2021_299_MOESM1_ESM.pdf [file 40364_2021_299_MOESM1_ESM.pdf]

p=0.0104

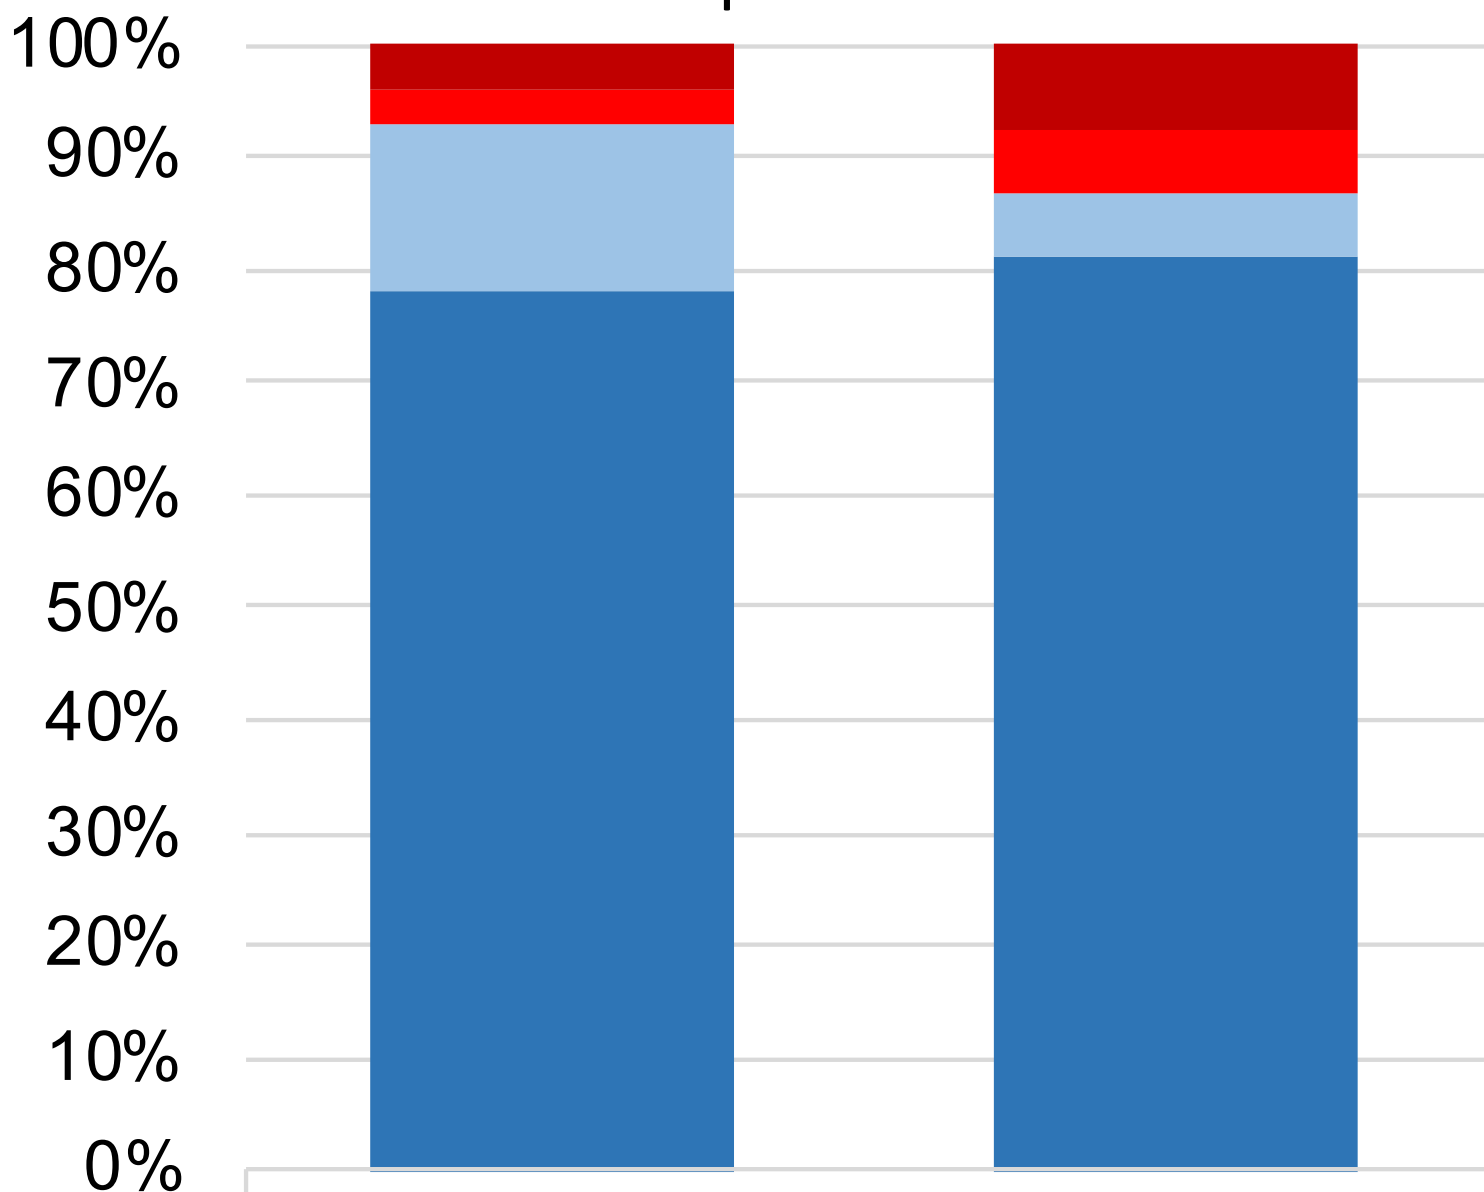

benigne (n=327)

maligne (n=331)

Tumor-Typ

- E Cadherin (%) strong
- E Cadherin (%) moderate
- E Cadherin (%) weak
- E Cadherin (%) negative
